# Supplementary material
Source: HighWire-hosted journal article supplement (https://qualitysafety.bmj.com/highwire/filestream/161422/field_highwire_adjunct_files/4/bmjqs-2021-014372supp005_data_supplement.pdf)
Supplement: bmjqs-2021-014372supp005_data_supplement.pdf [file bmjqs-2021-014372supp005_data_supplement.pdf]

## **SUPPLEMENT S5 – QUANTITATIVE DATA ANALYSIS**

### **Beliefs about Medicines Questionnaire (BMQ)**

The BMQ consists of the BMQ-General and BMQ-Specific, evaluating beliefs about medicines in general and beliefs about medicines prescribed for personal use respectively. The BMQ-General assesses beliefs that medicines are overused by physicians (*General-Overuse*) and beliefs that medicines are harmful (*General-Harm*). The BMQ-Specific assesses beliefs about the personal need for medicines to maintain health (*Specific-Necessity*) and concerns about the potential adverse effects of medicines (*Specific-Concerns*). Items on the BMQ subscales are scored on a 5-point Likert scale varying from 1="strongly disagree" to 5="strongly agree". Higher scores indicate stronger beliefs in the concepts of the sub-scale. Median scores for the four sub-scales were calculated. For the BMQ-Specific, the necessity-concerns differential was calculated by subtracting the concerns score from the necessity score resulting in four attitudinal groups: accepting (necessity  $\geq 15$ , concerns  $< 15$ ), ambivalent (necessity  $\geq 15$ , concerns  $\geq 15$ ), sceptical (necessity  $< 15$ , concerns  $\geq 15$ ) and indifferent (necessity  $< 15$ ; concerns  $< 15$ ).

### **Physician version of the 9-item shared-decision making questionnaire (SDM-Q-DOC)**

The SDM-Q-DOC is a validated 9-item questionnaire assessing the level of shared-decision making as perceived by the physician during a consultation.<sup>31</sup> The SDM-Q-DOC includes 9 statements that should be scored on a 6-point Likert scale ranging from "0=completely disagree" to 5="completely agree". Scores range between 0 and 100 with 0 representing the lowest possible level of SDM and 100 the highest possible level.<sup>31</sup>
